# Supplementary material
Source: PubMed Central journal article supplement (PMC10681097)
Supplement: NIHMS1943159-supplement-2.pdf [file NIHMS1943159-supplement-2.pdf]

## ■ ASSOCIATED CONTENT

### 📎 Supporting Information

The Supporting Information is available free of charge on the ACS Publications website at DOI: [10.1021/jacs.9b07294](https://doi.org/10.1021/jacs.9b07294).

Experimental procedures, NMR spectra, supplementary figures ([PDF](#))
